# Supplementary material for: VCP inhibition induces an unfolded protein response and apoptosis in human acute myeloid leukemia cells
Source: PubMed Central journal article supplement (PMC8986003; doi:10.1371/journal.pone.0266478), 2022-04-06
Supplement: pone.0266478.s002.pdf [file pone.0266478.s002.pdf]

# Raw images corresponding to Fig. 1a

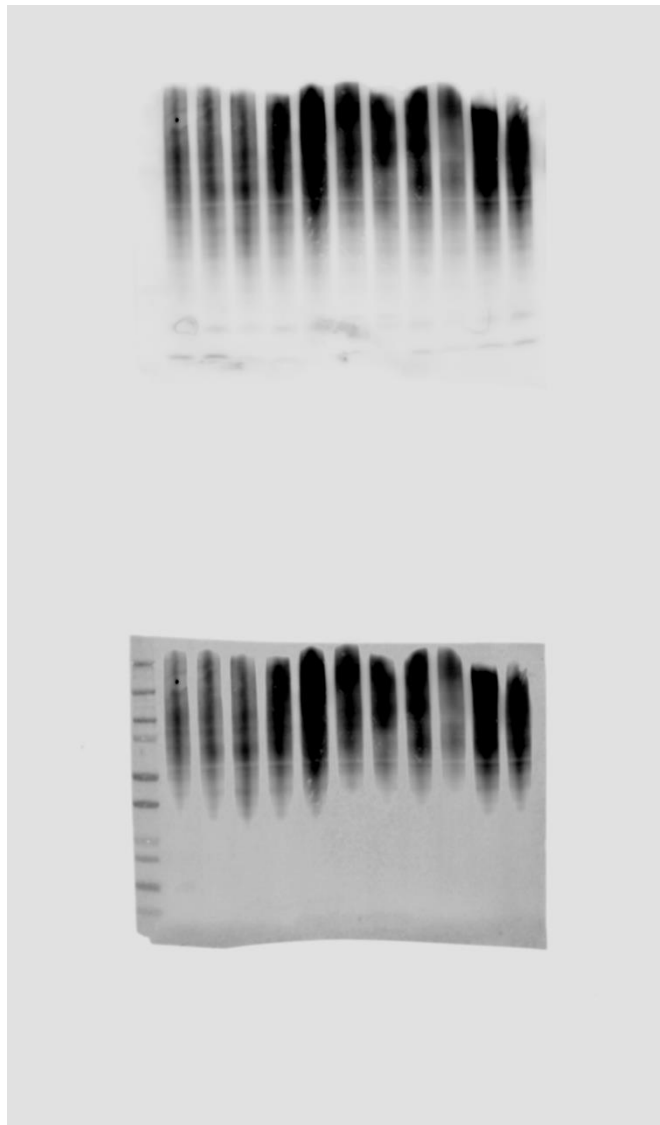

Primary antibody:  
Ubiquitin

Primary antibody:  
Ubiquitin

Lanes (left to right):  
Protein marker (10, 15, 20, 25, 37, 50, 75, 100, 150, 250 kDa)  
THP-1 / NT  
THP-1 / DMSO  
THP-1 / MG-132 (500 nM)  
THP-1 / MG-132 (5  $\mu$ M)  
THP-1 / MG-132 (50  $\mu$ M)  
THP-1 / CB-5083 (500 nM)  
THP-1 / CB-5083 (5  $\mu$ M)  
THP-1 / CB-5083 (50  $\mu$ M)  
THP-1 / NMS-873 (500 nM)  
THP-1 / NMS-873 (5  $\mu$ M)  
THP-1 / NMS-873 (50  $\mu$ M)

## Raw images corresponding to Fig. 1a

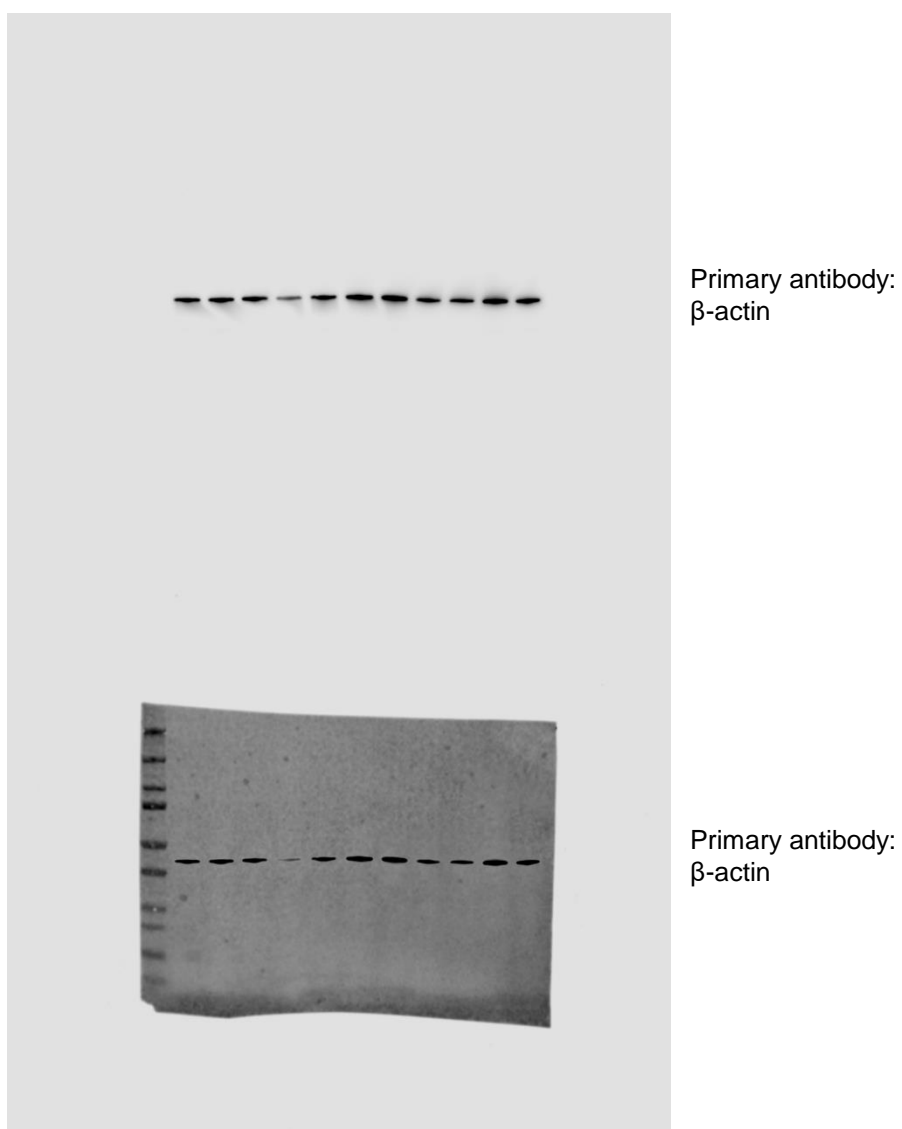

Lanes (left to right):

Protein marker (10, 15, 20, 25, 37, 50, 75, 100, 150, 250 kDa)

THP-1 / NT

THP-1 / DMSO

THP-1 / MG-132 (500 nM)

THP-1 / MG-132 (5  $\mu$ M)

THP-1 / MG-132 (50  $\mu$ M)

THP-1 / CB-5083 (500 nM)

THP-1 / CB-5083 (5  $\mu$ M)

THP-1 / CB-5083 (50  $\mu$ M)

THP-1 / NMS-873 (500 nM)

THP-1 / NMS-873 (5  $\mu$ M)

THP-1 / NMS-873 (50  $\mu$ M)

# Raw images corresponding to Fig. 1b

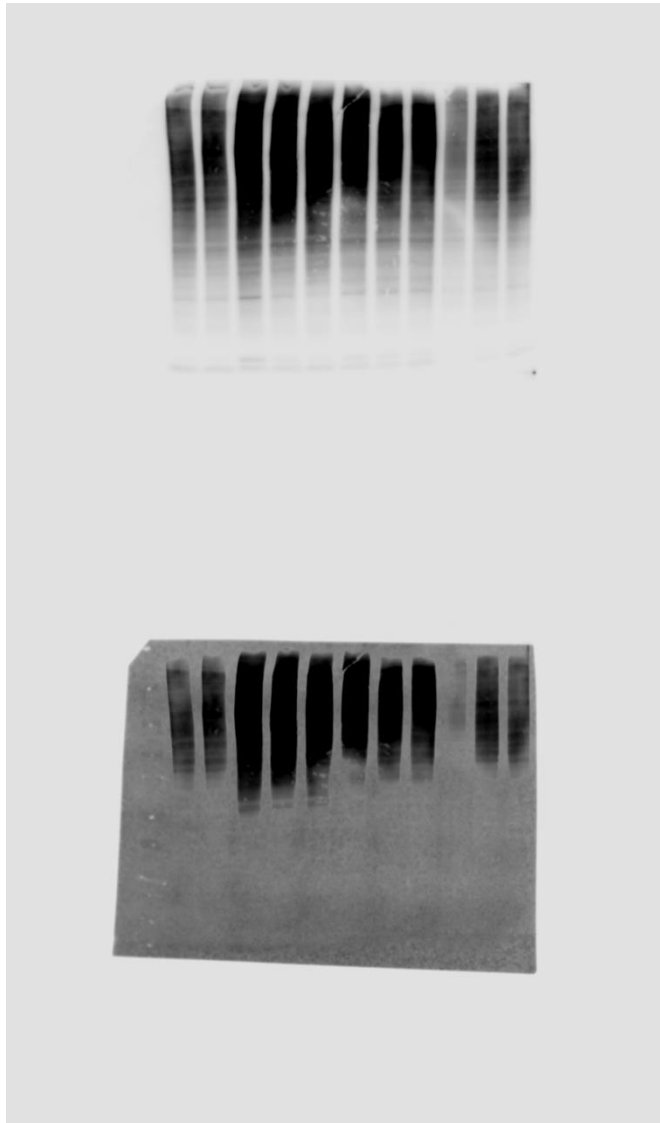

Primary antibody:  
Ubiquitin

Primary antibody:  
Ubiquitin

Lanes (left to right):  
Protein marker (10, 15, 20, 25, 37, 50, 75, 100, 150, 250 kDa)  
FFM05 / NT  
FFM05 / DMSO  
FFM05 / MG-132 (500 nM)  
FFM05 / MG-132 (5  $\mu$ M)  
FFM05 / MG-132 (50  $\mu$ M)  
FFM05 / CB-5083 (500 nM)  
FFM05 / CB-5083 (5  $\mu$ M)  
FFM05 / CB-5083 (50  $\mu$ M)  
FFM05 / NMS-873 (500 nM)  
FFM05 / NMS-873 (5  $\mu$ M)  
FFM05 / NMS-873 (50  $\mu$ M)

# Raw images corresponding to Fig. 1b

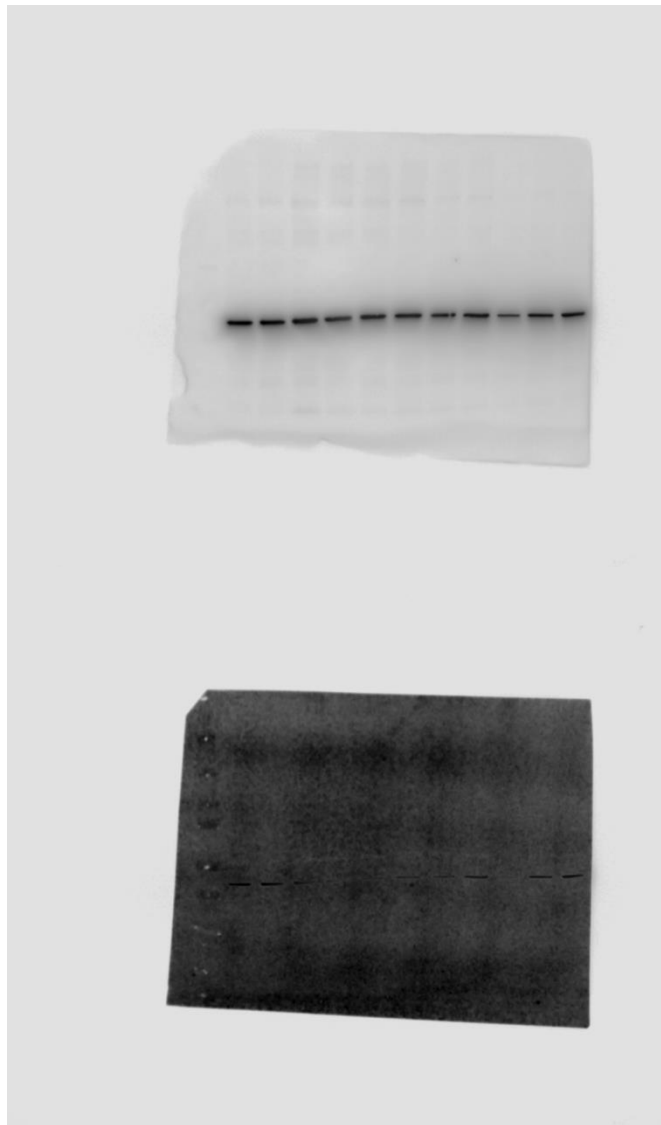

Primary antibody:  
 $\beta$ -actin

Primary antibody:  
 $\beta$ -actin

Lanes (left to right):  
Protein marker (10, 15, 20, 25, 37, 50, 75, 100, 150, 250 kDa)  
FFM05 / NT  
FFM05 / DMSO  
FFM05 / MG-132 (500 nM)  
FFM05 / MG-132 (5  $\mu$ M)  
FFM05 / MG-132 (50  $\mu$ M)  
FFM05 / CB-5083 (500 nM)  
FFM05 / CB-5083 (5  $\mu$ M)  
FFM05 / CB-5083 (50  $\mu$ M)  
FFM05 / NMS-873 (500 nM)  
FFM05 / NMS-873 (5  $\mu$ M)  
FFM05 / NMS-873 (50  $\mu$ M)

# Raw images corresponding to Fig. 1c

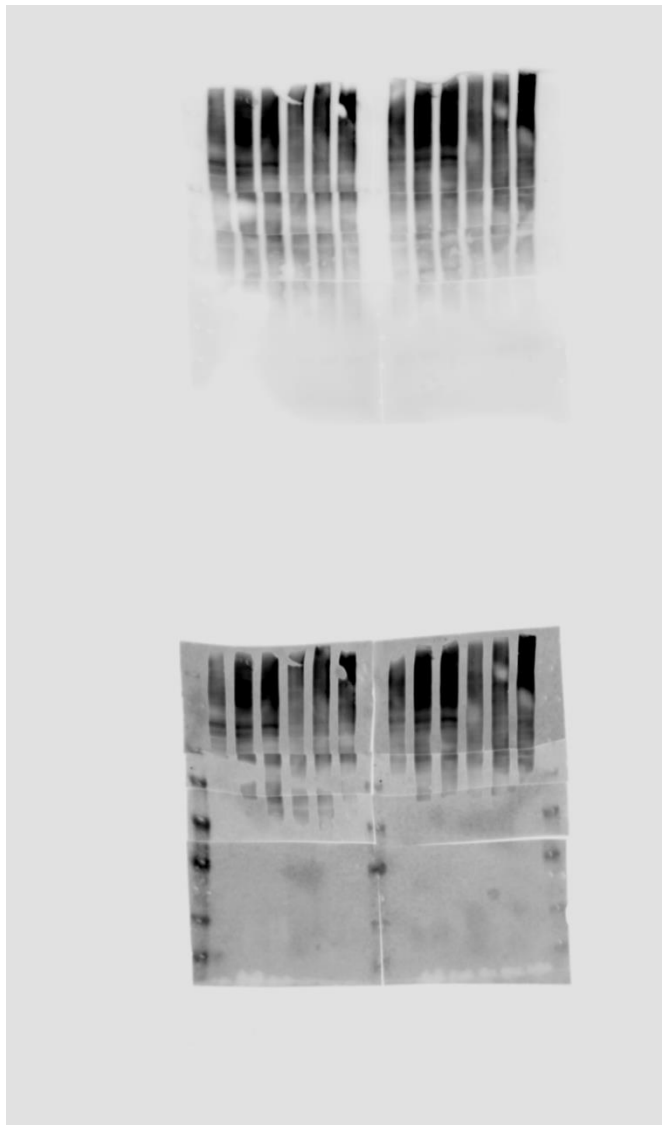

Primary antibody:  
Ubiquitin

Primary antibody:  
Ubiquitin

Lanes (left to right):  
Protein marker (6, 14, 17, 28, 38, 49, 62, 98, 198 kDa)  
MV4-11 / NT  
MV4-11 / CB-5083 (200 nM)  
MV4-11 / CB-5083 (500 nM)  
THP-1 / NT  
THP-1 / CB-5083 (200 nM)  
THP-1 / CB-5083 (500 nM)  
Protein marker (6, 14, 17, 28, 38, 49, 62, 98, 198 kDa)  
MV4-11 / NT  
MV4-11 / CB-5083 (200 nM)  
MV4-11 / CB-5083 (500 nM)  
THP-1 / NT  
THP-1 / CB-5083 (200 nM)  
THP-1 / CB-5083 (500 nM)  
Protein marker (6, 14, 17, 28, 38, 49, 62, 98, 198 kDa)

# Raw images corresponding to Fig. 1c

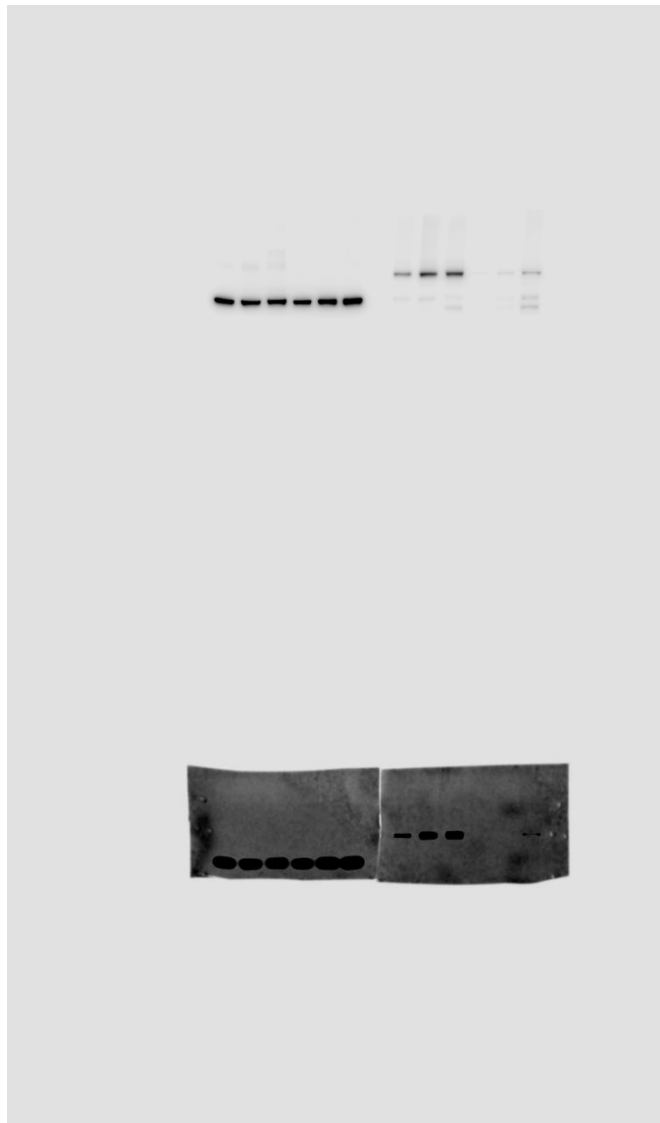

Primary antibody:  
Calnexin / IRE1 $\alpha$

Primary antibody:  
Calnexin / IRE1 $\alpha$

Lanes (left to right):  
Protein marker (6, 14, 17, 28, 38, 49, 62, 98, 198 kDa)  
MV4-11 / NT  
MV4-11 / CB-5083 (200 nM)  
MV4-11 / CB-5083 (500 nM)  
THP-1 / NT  
THP-1 / CB-5083 (200 nM)  
THP-1 / CB-5083 (500 nM)  
Protein marker (6, 14, 17, 28, 38, 49, 62, 98, 198 kDa)  
MV4-11 / NT  
MV4-11 / CB-5083 (200 nM)  
MV4-11 / CB-5083 (500 nM)  
THP-1 / NT  
THP-1 / CB-5083 (200 nM)  
THP-1 / CB-5083 (500 nM)  
Protein marker (6, 14, 17, 28, 38, 49, 62, 98, 198 kDa)

# Raw images corresponding to Fig. 1c

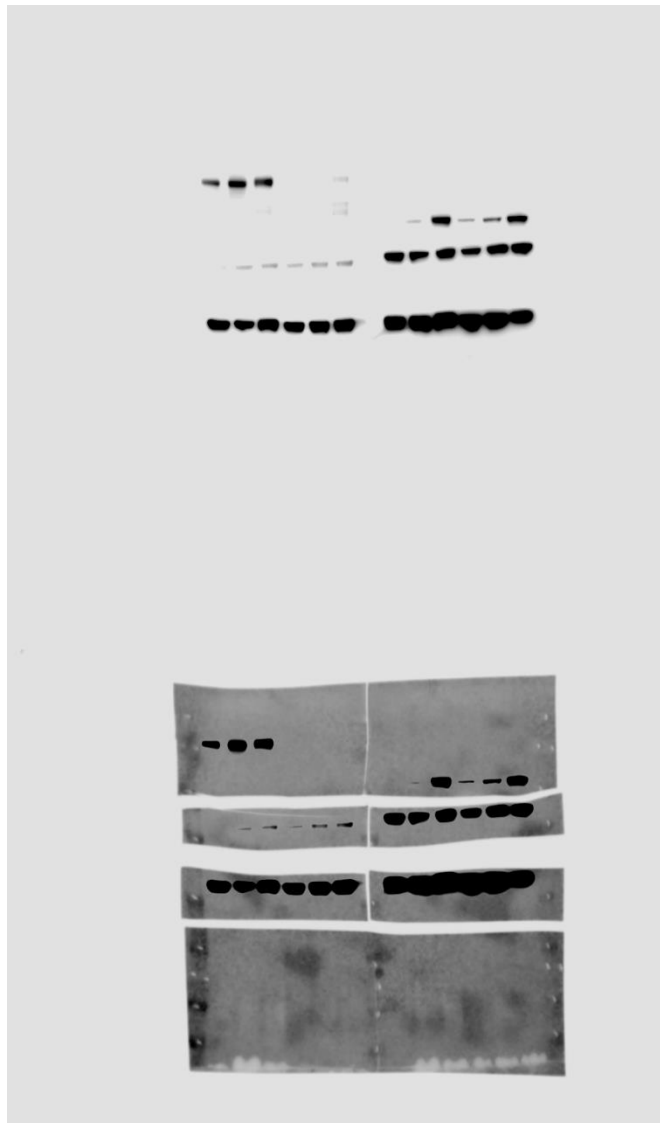

Primary antibody:  
PERK / BiP

Primary antibody:  
Ero1- $\alpha$  / PDI

Primary antibody:  
 $\beta$ -actin

Primary antibody:  
CHOP

Primary antibody:  
PERK / BiP

Primary antibody:  
Ero1- $\alpha$  / PDI

Primary antibody:  
 $\beta$ -actin

Primary antibody:  
CHOP

Lanes (left to right):

Protein marker (6, 14, 17, 28, 38, 49, 62, 98, 198 kDa)

MV4-11 / NT

MV4-11 / CB-5083 (200 nM)

MV4-11 / CB-5083 (500 nM)

THP-1 / NT

THP-1 / CB-5083 (200 nM)

THP-1 / CB-5083 (500 nM)

Protein marker (6, 14, 17, 28, 38, 49, 62, 98, 198 kDa)

MV4-11 / NT

MV4-11 / CB-5083 (200 nM)

MV4-11 / CB-5083 (500 nM)

THP-1 / NT

THP-1 / CB-5083 (200 nM)

THP-1 / CB-5083 (500 nM)

Protein marker (6, 14, 17, 28, 38, 49, 62, 98, 198 kDa)

# Raw images corresponding to Fig. 6a

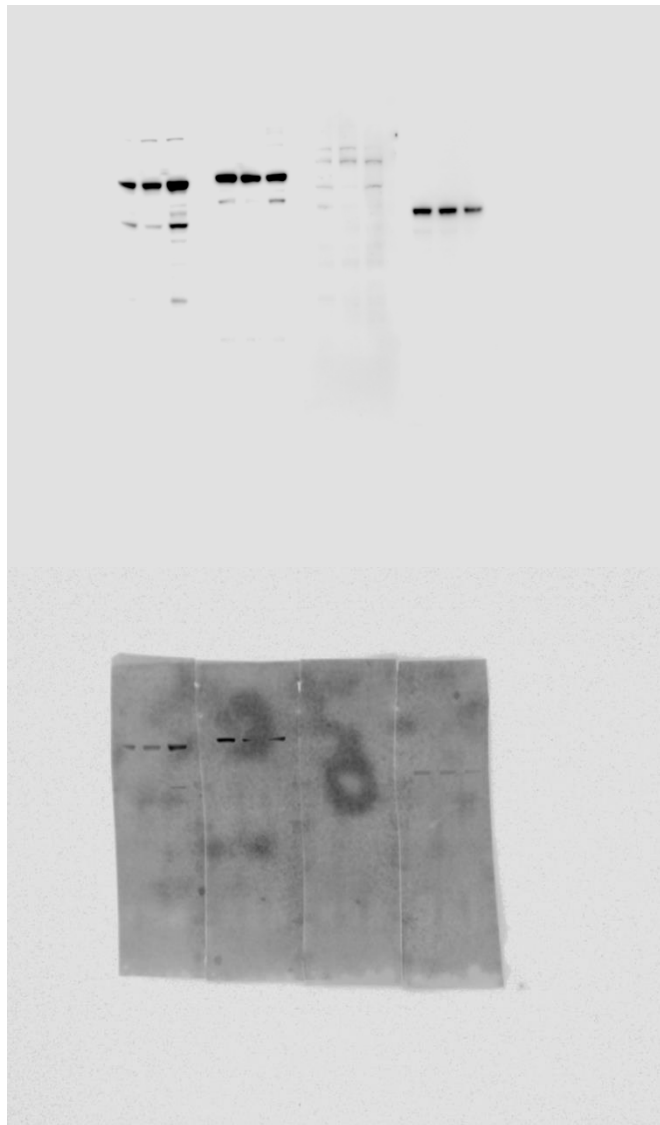

Primary antibody:  
BiP / Calnexin /  
CHOP / Ero1- $\alpha$

Primary antibody:  
BiP / Calnexin /  
CHOP / Ero1- $\alpha$

Lanes (left to right):

MV4-11 / NT

MV4-11 / CB-5083 (200 nM)

MV4-11 / CB-5083 (500 nM)

Protein marker (6, 14, 17, 28, 38, 49, 62, 98, 198 kDa)

MV4-11 / NT

MV4-11 / CB-5083 (200 nM)

MV4-11 / CB-5083 (500 nM)

Protein marker (6, 14, 17, 28, 38, 49, 62, 98, 198 kDa)

MV4-11 / NT

MV4-11 / CB-5083 (200 nM)

MV4-11 / CB-5083 (500 nM)

Protein marker (6, 14, 17, 28, 38, 49, 62, 98, 198 kDa)

MV4-11 / NT

MV4-11 / CB-5083 (200 nM)

MV4-11 / CB-5083 (500 nM)



# Raw images corresponding to Fig. 6a

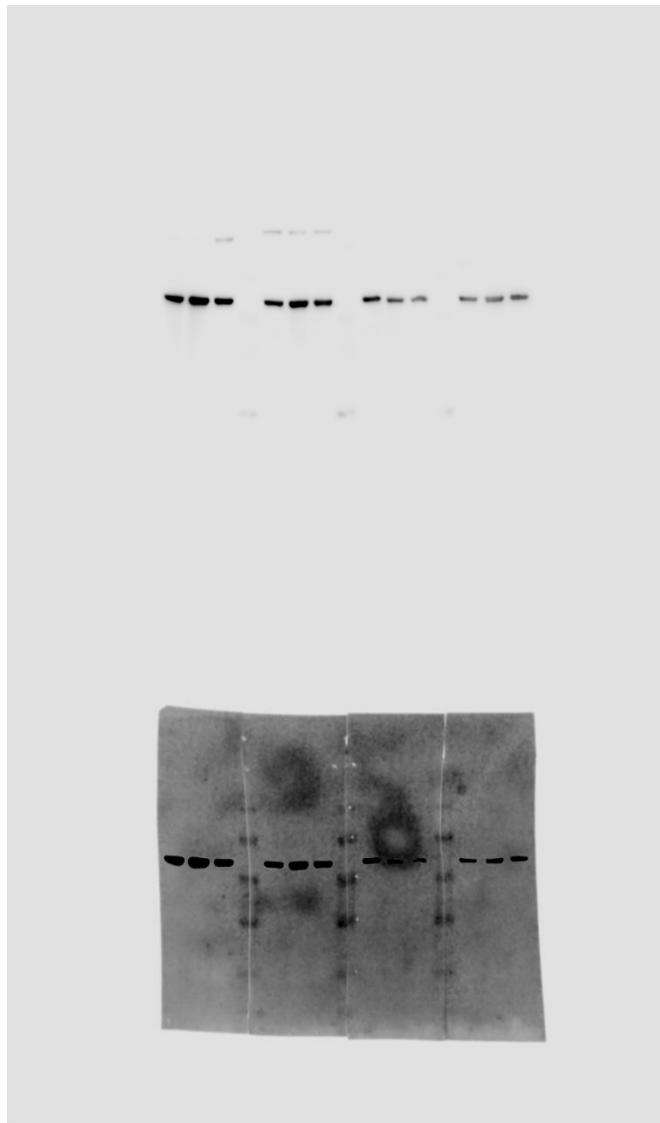

Primary antibody:  
 $\beta$ -actin

Primary antibody:  
 $\beta$ -actin

Lanes (left to right):

MV4-11 / NT

MV4-11 / CB-5083 (200 nM)

MV4-11 / CB-5083 (500 nM)

Protein marker (6, 14, 17, 28, 38, 49, 62, 98, 198 kDa)

MV4-11 / NT

MV4-11 / CB-5083 (200 nM)

MV4-11 / CB-5083 (500 nM)

Protein marker (6, 14, 17, 28, 38, 49, 62, 98, 198 kDa)

MV4-11 / NT

MV4-11 / CB-5083 (200 nM)

MV4-11 / CB-5083 (500 nM)

Protein marker (6, 14, 17, 28, 38, 49, 62, 98, 198 kDa)

MV4-11 / NT

MV4-11 / CB-5083 (200 nM)

MV4-11 / CB-5083 (500 nM)

# Raw images corresponding to Fig. 6a

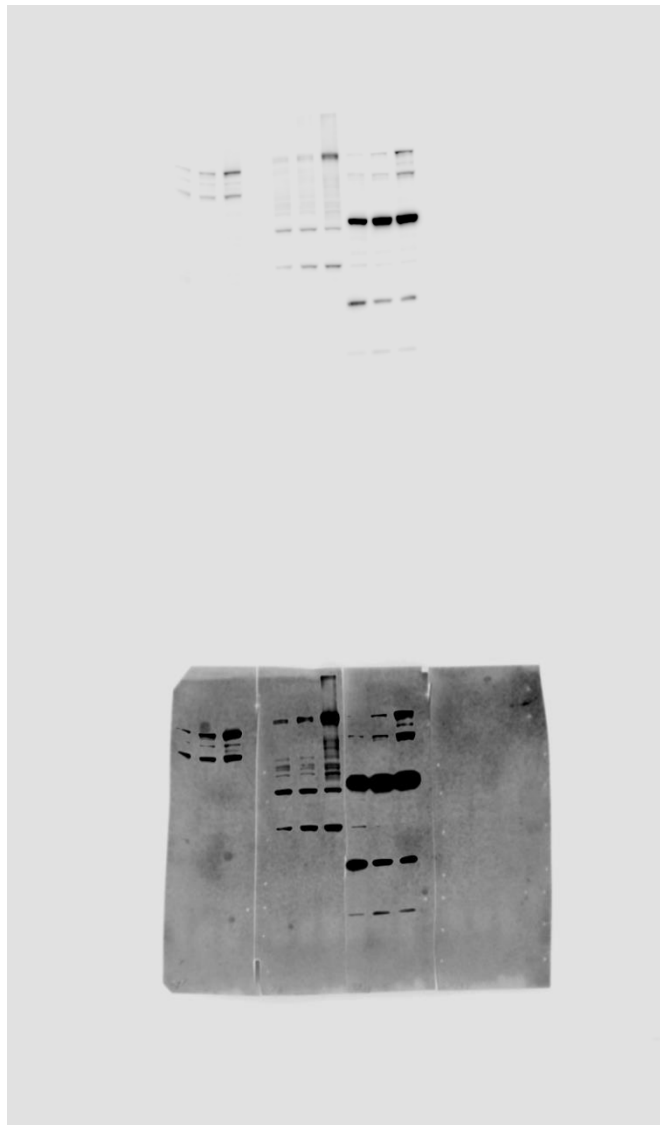

Primary antibody:  
IRE1 $\alpha$  / PERK / PDI

Primary antibody:  
IRE1 $\alpha$  / PERK / PDI

Lanes (left to right):  
MV4-11 / NT  
MV4-11 / CB-5083 (200 nM)  
MV4-11 / CB-5083 (500 nM)  
Protein marker (6, 14, 17, 28, 38, 49, 62, 98, 198 kDa)  
MV4-11 / NT  
MV4-11 / CB-5083 (200 nM)  
MV4-11 / CB-5083 (500 nM)  
MV4-11 / NT  
MV4-11 / CB-5083 (200 nM)  
MV4-11 / CB-5083 (500 nM)  
Protein marker (6, 14, 17, 28, 38, 49, 62, 98, 198 kDa)  
MV4-11 / NT  
MV4-11 / CB-5083 (200 nM)  
MV4-11 / CB-5083 (500 nM)  
Protein marker (6, 14, 17, 28, 38, 49, 62, 98, 198 kDa)

## Raw images corresponding to Fig. 6a

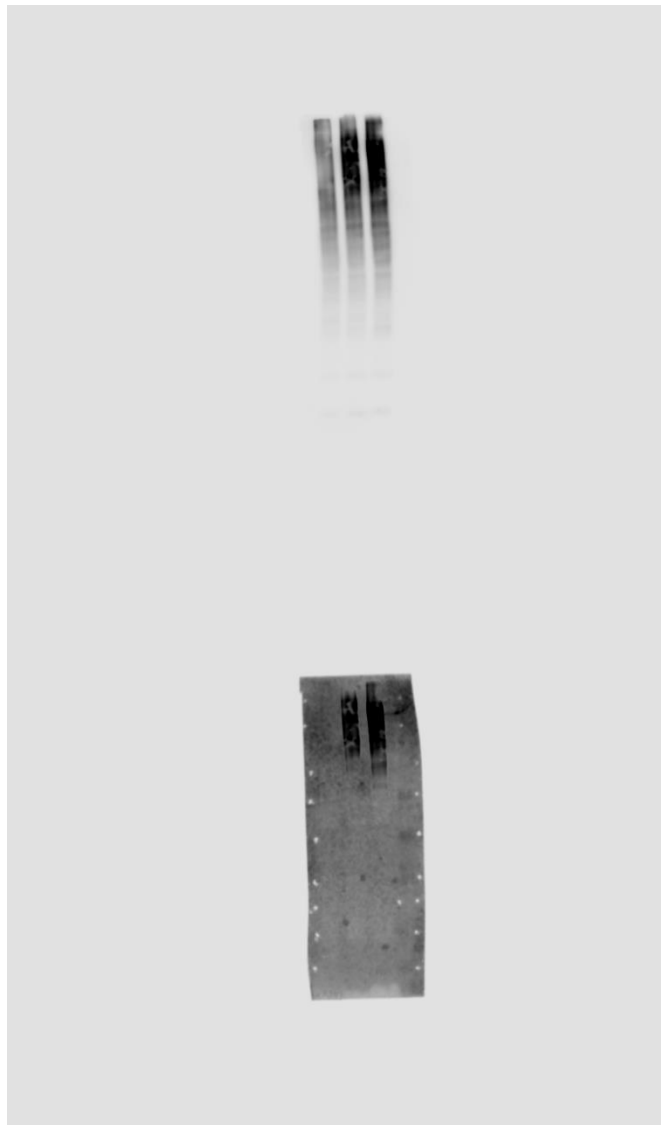

Primary antibody:  
Ubiquitin

Primary antibody:  
Ubiquitin

Lanes (left to right):  
MV4-11 / NT  
MV4-11 / CB-5083 (200 nM)  
MV4-11 / CB-5083 (500 nM)  
Protein marker (6, 14, 17, 28, 38, 49, 62, 98, 198 kDa)

# Raw images corresponding to Fig. 6a

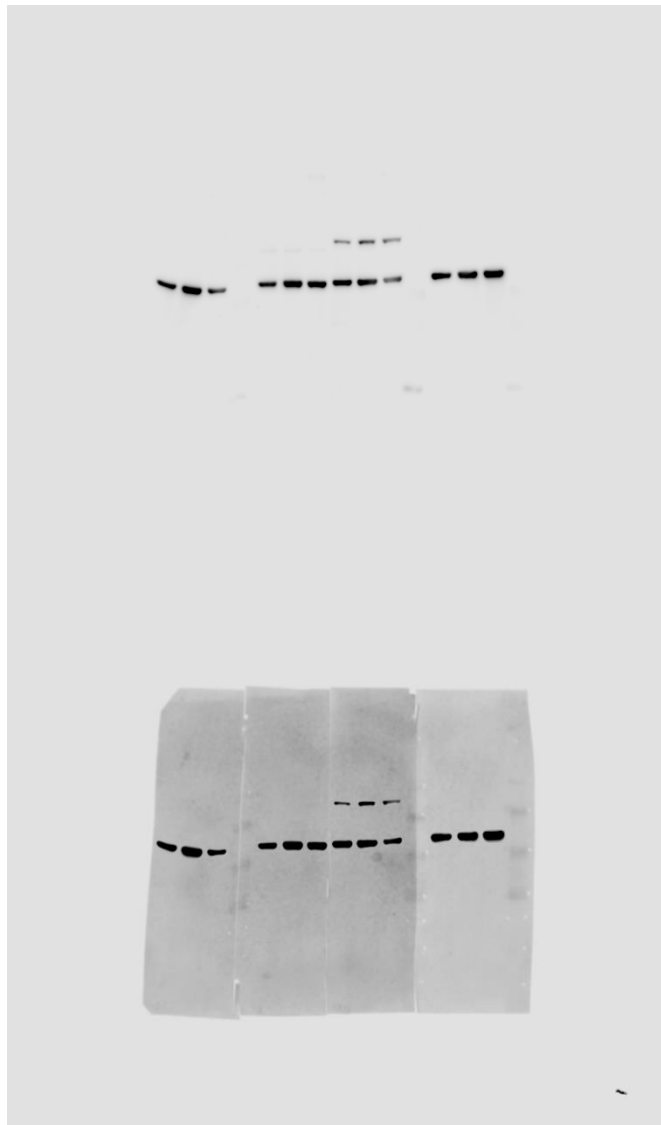

Lanes (left to right):

MV4-11 / NT

MV4-11 / CB-5083 (200 nM)

MV4-11 / CB-5083 (500 nM)

Protein marker (6, 14, 17, 28, 38, 49, 62, 98, 198 kDa)

MV4-11 / NT

MV4-11 / CB-5083 (200 nM)

MV4-11 / CB-5083 (500 nM)

MV4-11 / NT

MV4-11 / CB-5083 (200 nM)

MV4-11 / CB-5083 (500 nM)

Protein marker (6, 14, 17, 28, 38, 49, 62, 98, 198 kDa)

MV4-11 / NT

MV4-11 / CB-5083 (200 nM)

MV4-11 / CB-5083 (500 nM)

Protein marker (6, 14, 17, 28, 38, 49, 62, 98, 198 kDa)
